# Supplementary material for: Revealing the History and Mystery of RNA-Seq
Source: MDPI journal article supplement (doi:10.3390/cimb45030120), 2023-02-24
Supplement: s1 [file s1]

## Supplementary Document (R-scripts)

### Call the libraries

```
library(ggplot2)
library(ggrepel)
```

### ##### Volcano plot for Transcriptomics data #####

```
de <- read.table("YourFile", header = TRUE, sep = "\t")
ggplot(YourFile, aes(x=log2_FC, y=-log(P_value)))+
  geom_point(aes(color="black", size=0.5, alpha= 1)) +
  labs(y=expression('-Log'[10]*' P-Value'), x=expression('Log'[2]*' fold change'))+
  scale_color_manual(values=c('black'))+ theme_bw()+
  theme(legend.position = "none", panel.grid.major = element_blank(), panel.grid.minor =
element_blank(), panel.background = element_blank(), axis.line = element_line(colour = "black"), )
```

### ##### GSEA #####

```
library(tidyverse)
library(dplyr)
library(fgsea)
```

```
ranks <- tibble::deframe(YourFile)
head(ranks, 20)
```

### # Load the pathways into a named list

```
pathways.hallmark <- gmtPathways("h.all.v7.5.1.symbols.gmt")
#pathways.hallmark
```

### # Show the first few pathways, and within those, show only the first few genes.

```
pathways.hallmark %>%
  head() %>%
  lapply(head)
```

### # run the fgsea algorithm with 1000 permutations:

```
fgseaRes <- fgsea(pathways=pathways.hallmark, stats=ranks, scoreType = "std")
```

```
fgseaResTidy <- fgseaRes %>%
  as_tibble() %>%
  arrange(desc(NES))
```

### # Show in a nice table:

```
fgseaResTidy %>%
  dplyr::select(-leadingEdge, -ES) %>%
  arrange(padj) %>%
  DT::datatable()
```

**#Plot the normalized enrichment scores. Color the bar indicating whether or not the pathway is significant:**

```
ggplot(fgseaResTidy, aes(reorder(pathway, NES), NES)) +  
  geom_col(aes(fill=padj<0.05)) +  
  coord_flip() +  
  labs(x="Pathway", y="Normalized Enrichment Score",  
       title="Hallmark pathways NES from GSEA") +  
  theme_minimal()
```

```
head(fgseaRes[order(padj), ])
```

**###GSEA pathway enrichment plot###**

```
plotEnrichment(pathway =  
  pathways.hallmark[["HALLMARK_MYC_TARGETS_V1"]],  
  stats= ranks) + labs(title="HALLMARK_MYC_TARGETS_V1 ") +  
  theme(plot.title = element_text(hjust = 0.5, face="bold"))
```

**##### MA plot #####**

```
library("DESeq2")  
plotMA(YourFile)
```

**##### heatmap #####**

```
library("pheatmap")  
setwd("YourDirectory")  
de <- read.table("YourFile", header = TRUE, sep = "\t")  
data_de <- melt(de)
```

```
ggplot(data_de, aes(variable, Gene)) +geom_tile(aes(fill = value))+ scale_fill_gradient(low = "red",  
high = "green")
```

**##### boxplot jitter #####**

```
data_mod <- melt(YourSummary_AllEvents_rMATS, id.vars=colnames(YourSummary_AllEvents_rMATS),  
  measure.vars=c("A3SS", "A5SS", "MXE", "SE", "RI"))
```

```
ggplot(data_mod, aes(x = variable, y = value))+  
  geom_boxplot(outlier.shape = NA) +ylim(-1,1)+  
  geom_jitter(alpha=0.4, aes(color=variable))+  
  coord_flip()+  
  theme_bw()
```
